# Supplementary material for: The Influence of Comprehensibility on Interest and Comprehension
Source: Atypon-hosted journal article supplement (doi:10.1024/1010-0652/a000349), 2022-08-12
Supplement: 1010-0652_a000349_esm1.pdf [file 1010-0652_a000349_esm1.pdf]

**ESM 1 – Table**

*Psychometric properties and correlations between the scales of the comprehensibility questionnaires and the dependent variables*

| Measure (number of items)                | <i>M (SD)</i> | <i>N</i> | $\alpha$ | 1     | 2     | 3     | 4     | 5    | 6    | 7    | 8    | 9    | 10   |
|------------------------------------------|---------------|----------|----------|-------|-------|-------|-------|------|------|------|------|------|------|
| 1) subjective comprehensibility (3)      | 2.14 (1.02)   | 147      | .90      |       | .03   | .03   | .08   | .04  | .05  | -    | -    | -    | -    |
| 2) word difficulty (3)                   | 1.72 (1.05)   | 149      | .89      | -.80* |       | .05   | .08   | .04  | .06  | -    | -    | -    | -    |
| 3) sentence difficulty (3)               | 1.40 (0.86)   | 149      | .83      | -.76* | .60*  |       | .08   | .06  | .06  | -    | -    | -    | -    |
| 4) effort needed for reorganizations (3) | 0.97 (0.62)   | 148      | .63      | -.19* | .13   | .22*  |       | .08  | .08  | -    | -    | -    | -    |
| 5) clarity of representation (3)         | 1.63 (0.88)   | 149      | .74      | .73*  | -.68* | -.51* | -.13  |      | .06  | -    | -    | -    | -    |
| 6) variety of language use (3)           | 1.58 (0.93)   | 149      | .83      | .66*  | -.53* | -.50* | -.04  | .52* |      | -    | -    | -    | -    |
| 7) simplicity (6)                        | 2.56 (0.81)   | 152      | .83      | -     | -     | -     | -     | -    | -    |      | .03  | .07  | .06  |
| 8) organization/ordering (6)             | 2.88 (0.79)   | 147      | .57      | -     | -     | -     | -     | -    | -    | .77* |      | .06  | .06  |
| 9) concision (6)                         | 2.21 (0.53)   | 148      | .87      | -     | -     | -     | -     | -    | -    | .39* | .56* |      | .08  |
| 10) additional stimulant (4)             | 1.63 (0.84)   | 152      | .81      | -     | -     | -     | -     | -    | -    | .55* | .47* | .27* |      |
| interestingness (1)                      | 1.74 (1.08)   | 302      | -        | .52*  | -.41* | -.37* | -.03  | .46* | .44* | .41* | .37* | .28* | .65* |
| Interest after reading (4)               | 1.30 (0.81)   | 302      | .89      | .54*  | -.47* | -.38* | -.03  | .46* | .44* | .37* | .30* | .22* | .67* |
| comprehension (6)                        | 3.30 (2.09)   | 302      | .80      | .54*  | -.49* | -.29* | -.17* | .54* | .29* | .32* | .23* | .06  | .34* |

*Note.* The lower diagonal contains the correlations of the variables. The upper diagonal contains the standard errors for these correlations according to Bonnet and Wright (2000). Variables 1 to 6 were assessed using the comprehensibility questionnaire from Friedrich (2017). Variables 7 to 10 were assessed using the comprehensibility questionnaire from Jucks (2001). No correlations could be calculated between these questionnaires, since they were surveyed on disjoint subsamples.

\* $p < .05$ , one-tailed.
